# Supplementary material
Source: PubMed Central journal article supplement (PMC1316116)
Supplement: nar_33_22_7120__1.pdf [file nar_33_22_7120__1.pdf]

## Supplemental Research Data

The following pages contain scatter-plots of estimated versus real accuracy for the Balibase, Prefab, SABmark superfamily and SABmark twilight benchmark. We estimated the accuracy using both MOS and norMD score. The Pearson correlation coefficient ( $r$ ) is given for each scatter-plot.

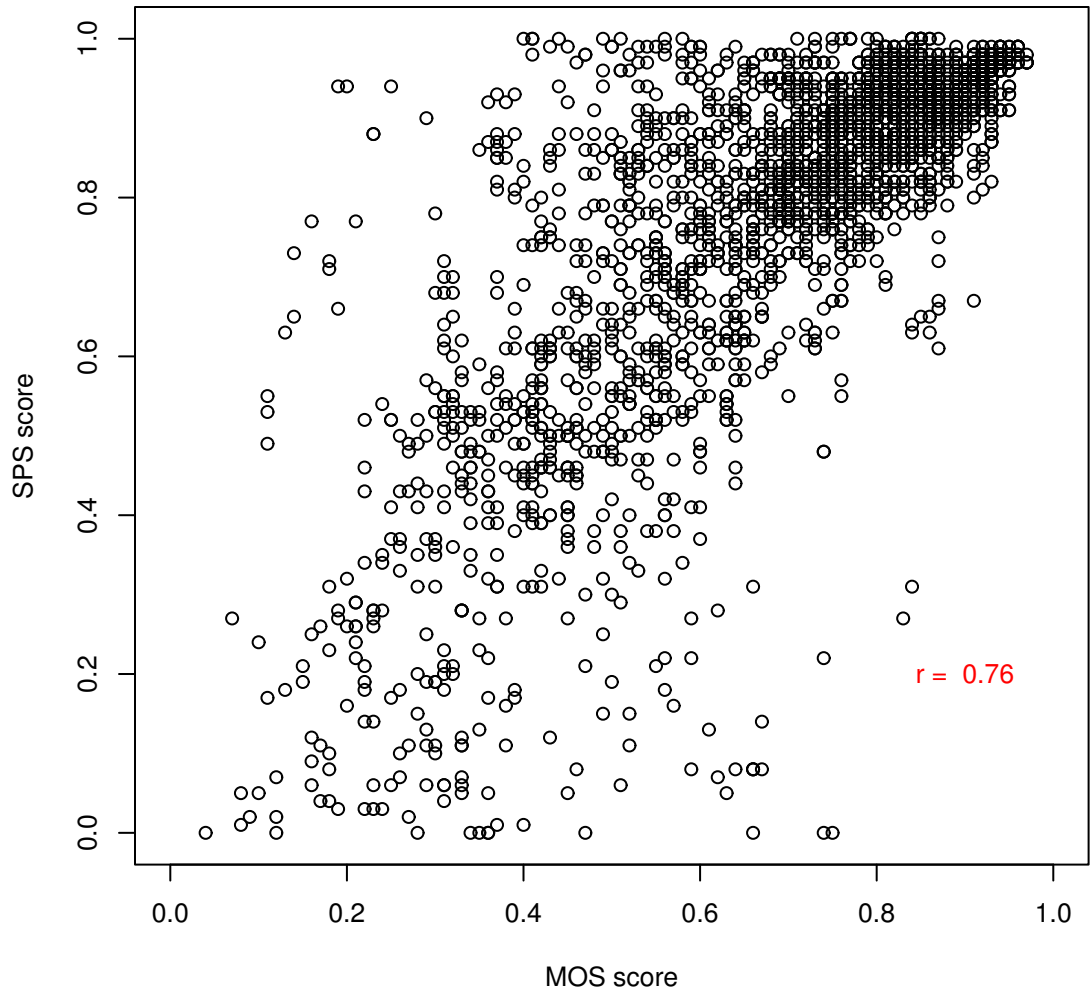

Figure 1: Scatter-plot of estimated accuracy (MOS) versus real accuracy (SPS) on the Balibase test set.

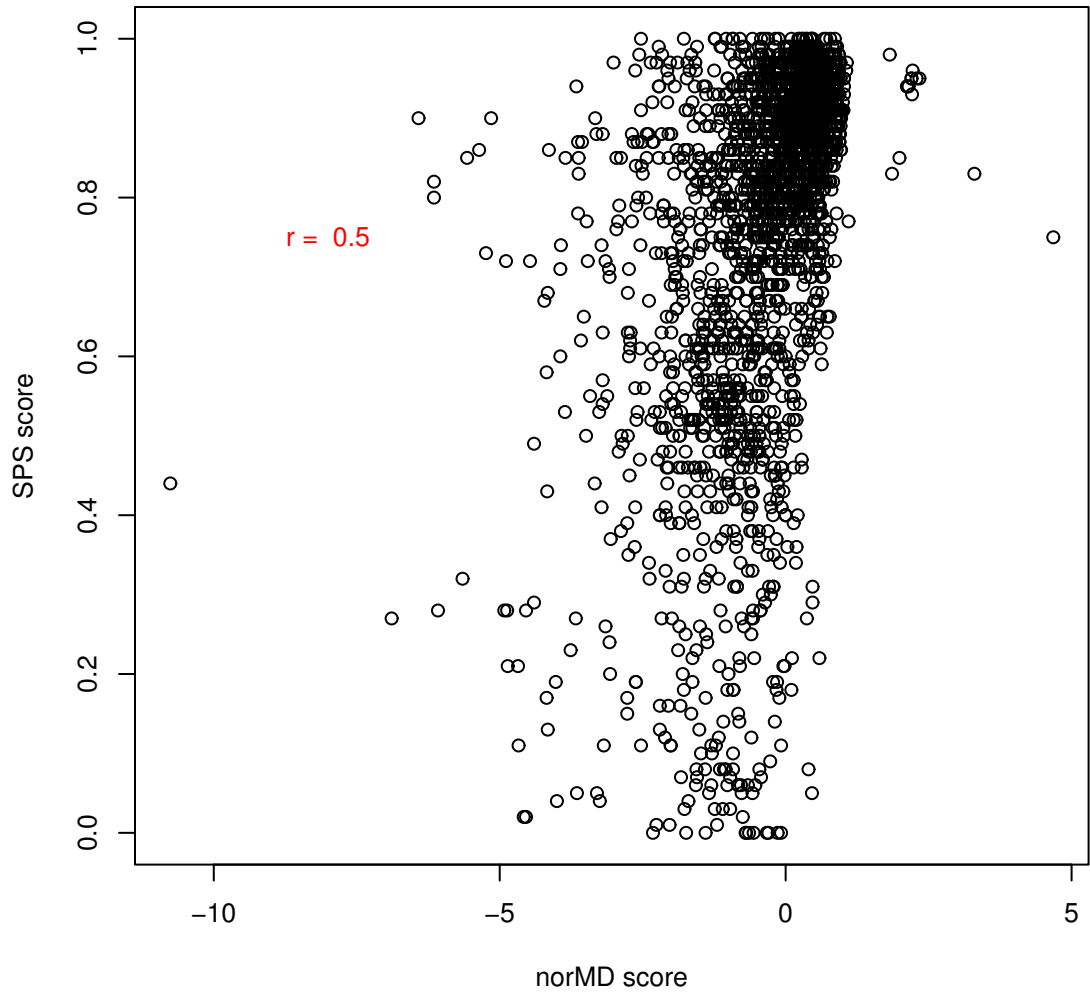

Figure 2: Scatter-plot of estimated accuracy (norMD) versus real accuracy (SPS) on the Balibase test set.

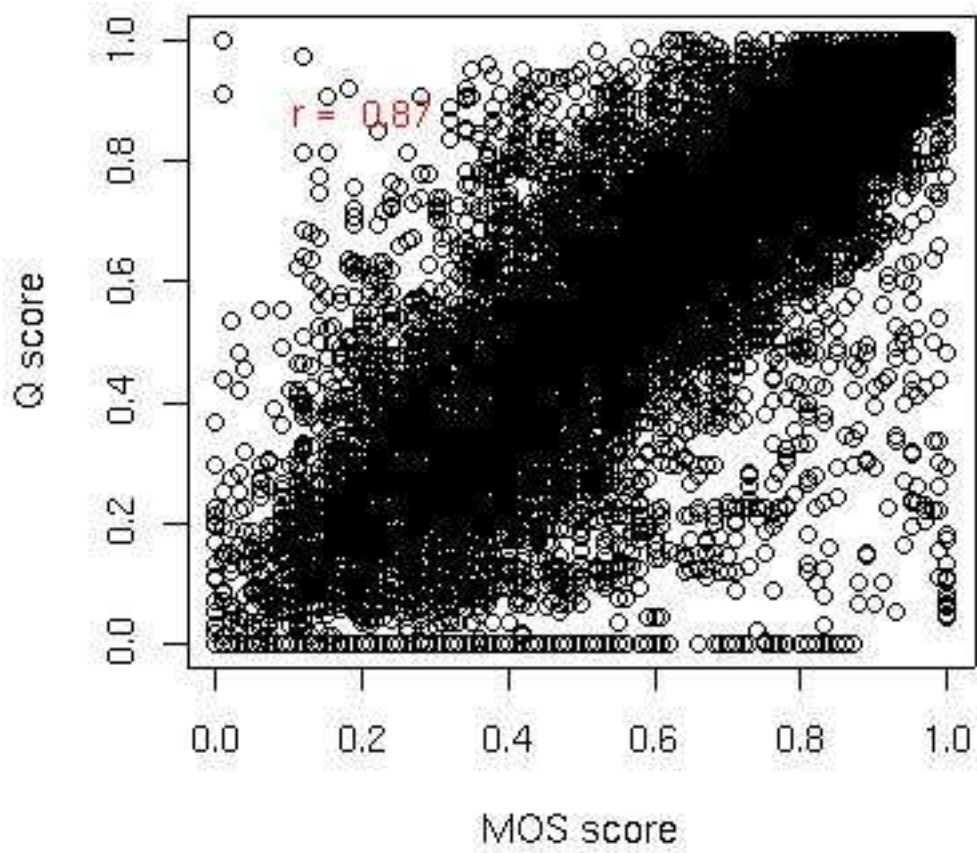

Figure 3: Scatter-plot of estimated accuracy (MOS) versus real accuracy (Q) on the Prefab test set.

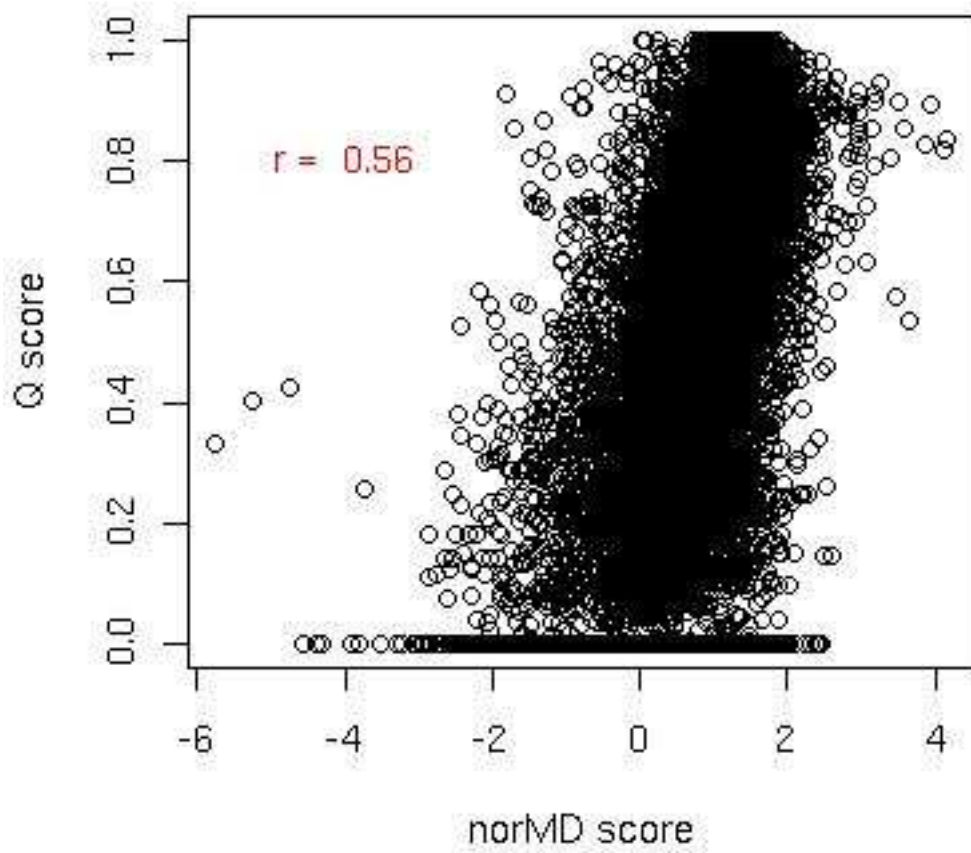

Figure 4: Scatter-plot of estimated accuracy (norMD) versus real accuracy (Q) on the Prefab test set.

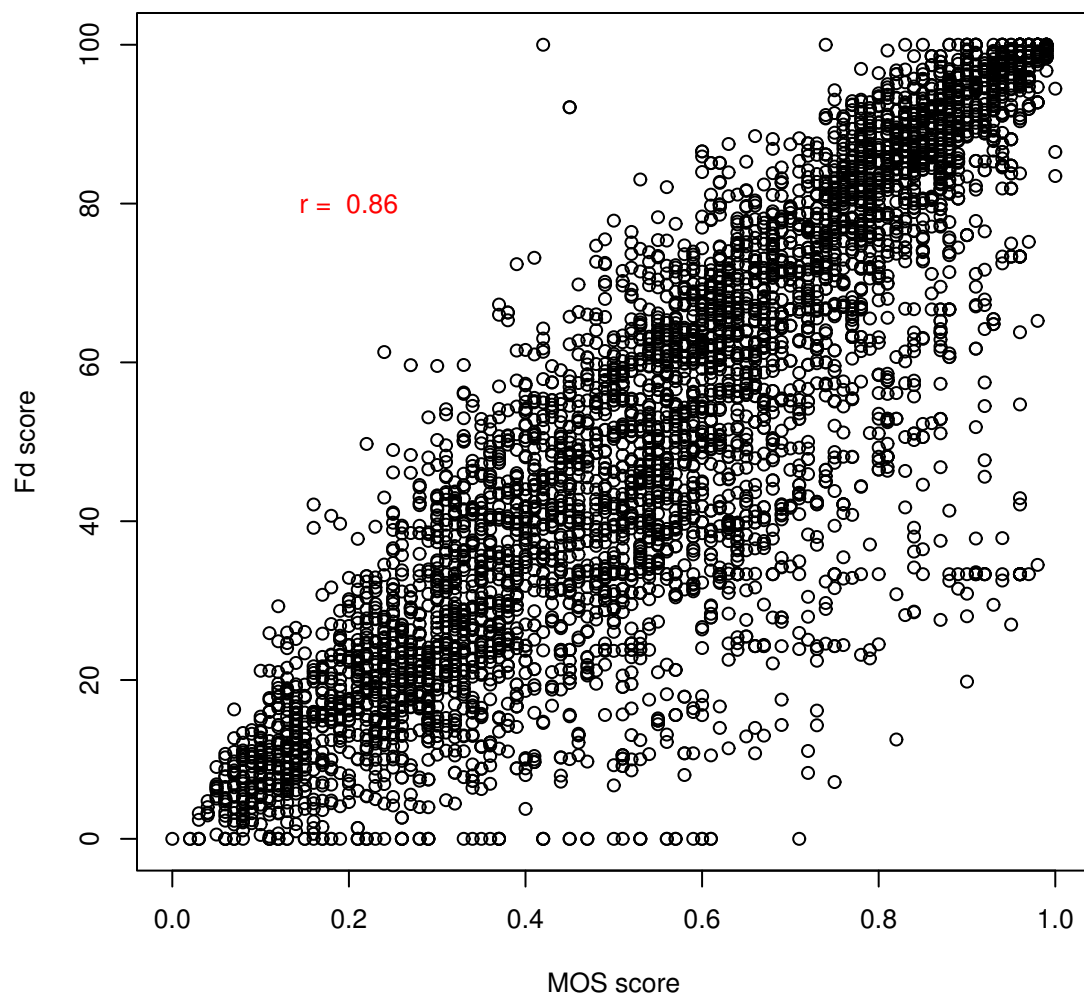

Figure 5: Scatter-plot of estimated accuracy (MOS) versus real accuracy (Fd) on the SABmark superfamily test set.

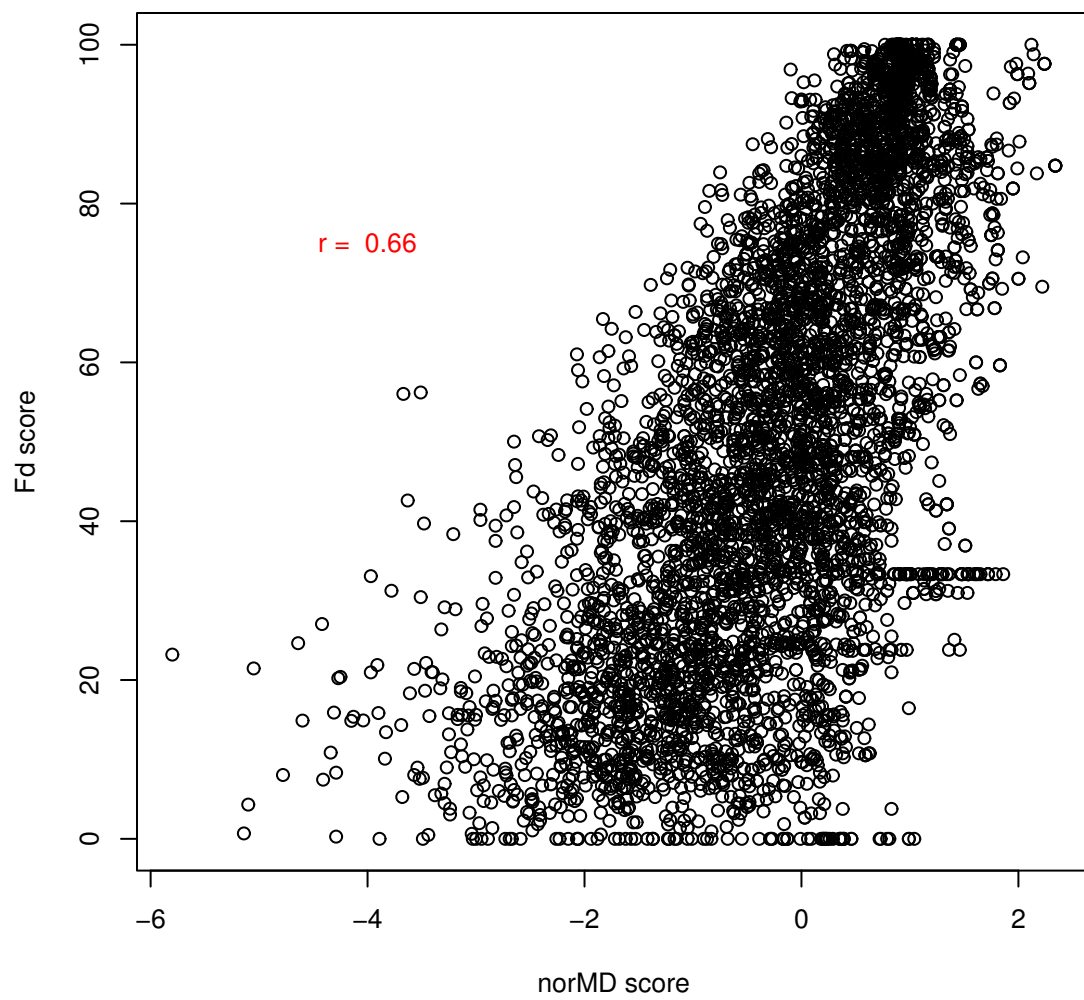

Figure 6: Scatter-plot of estimated accuracy (norMD) versus real accuracy (Fd) on the SABmark superfamily test set.

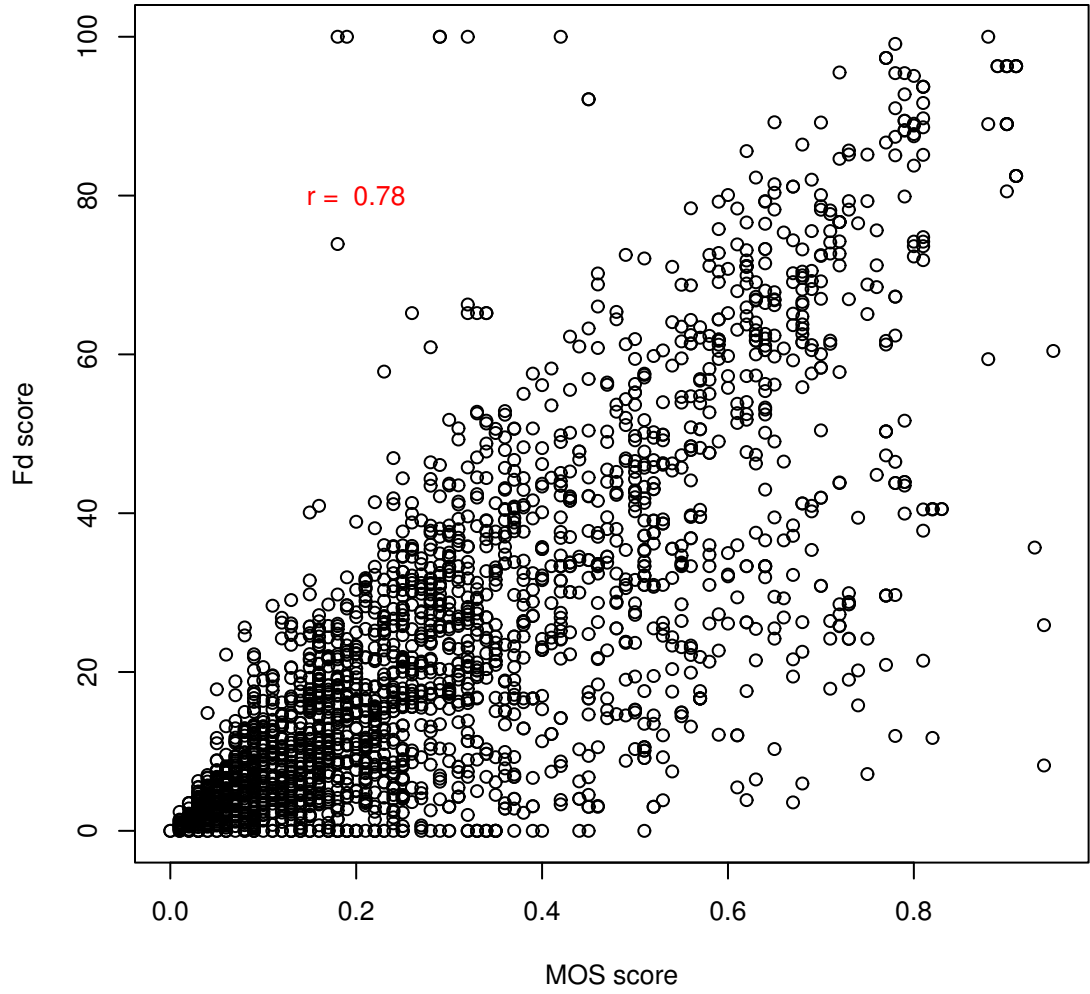

Figure 7: Scatter-plot of estimated accuracy (MOS) versus real accuracy (Fd) on the SABmark twilight test set.



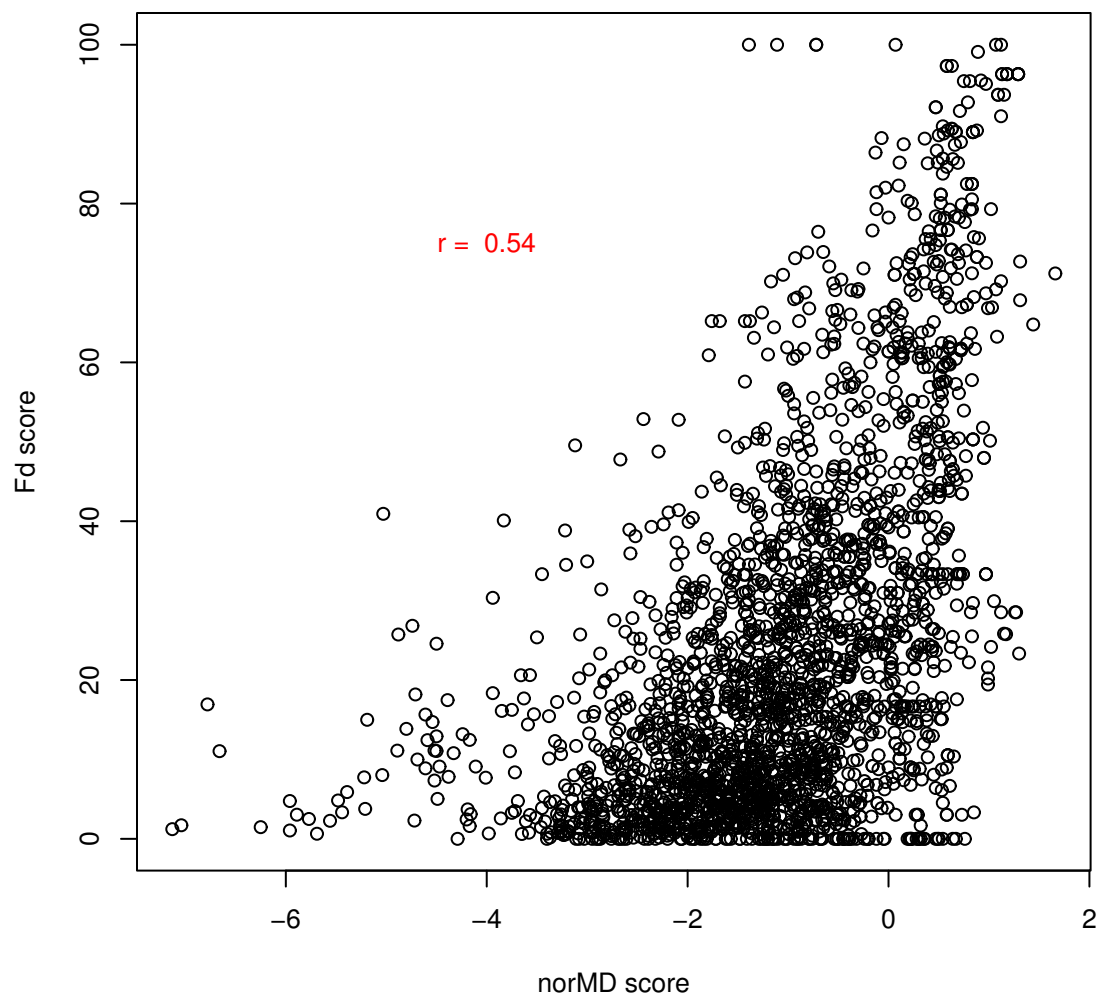

Figure 8: Scatter-plot of estimated accuracy (norMD) versus real accuracy (Fd) on the SABmark twilight test set.
